# Supplementary material
Source: MDPI journal article supplement (https://www.mdpi.com/2073-4344/12/8/881)
Supplement: s1 [file s1 › catalysts-1838426-supplementary.pdf]

# First-Principles Study of Stability and N<sub>2</sub> Activation on the Octahedron RuRh Clusters

Nan Zhang <sup>1,\*</sup>, Lixia Ma <sup>1</sup>, Luo Huang <sup>1</sup>, Houyu Zhu <sup>2</sup>, Ruibin Jiang <sup>1,\*</sup>

<sup>1</sup> Shaanxi Key Laboratory for Advanced Energy Devices, Shaanxi Engineering Lab for Advanced Energy Technology, School of Materials Science and Engineering, Shaanxi Normal University, Xi'an 710119, China.

<sup>2</sup> School of Materials Science and Engineering, China University of Petroleum (East China), Qingdao, Shandong 266580, China.

\* Correspondence: nanzhang@snnu.edu.cn (N.Z.), rbjiang@snnu.edu.cn (R.J.)

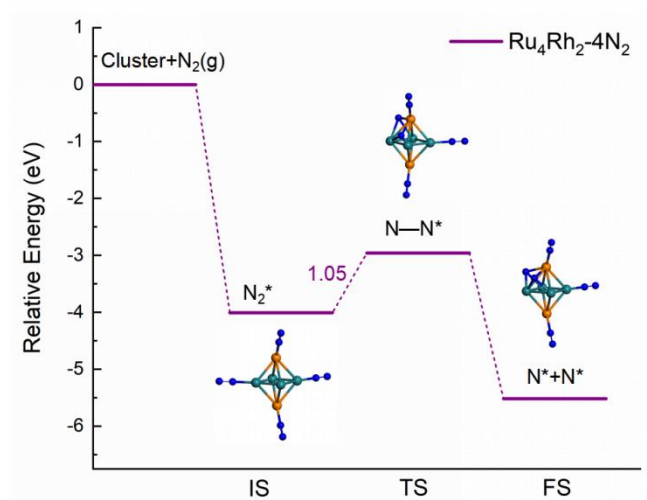

Figure S1. Potential energy surface comparing N<sub>2</sub> dissociation on Ru<sub>4</sub>Rh<sub>2</sub> cluster. Geometric structure of the IS, TS, and FS of four N<sub>2</sub> molecule in elementary reactions on Ru<sub>4</sub>Rh<sub>2</sub> cluster.
